# Supplementary material for: Safety Aspects of Genetically Modified Lactic Acid Bacteria
Source: MDPI journal article supplement (doi:10.3390/microorganisms8020297), 2020-02-21
Supplement: s1 [file s1]

**Supplementary Table S1:** Lactic acid bacteria ‘generally recognized as safe’ (GRAS) notices (adapted from GRAS Notices inventory; on Jan 6, 2020).

| Substance                                                                                                                                   | Intended use                                                                                                                                                                                                                                                                                                                                  | GRN No. | Date of closure |
|---------------------------------------------------------------------------------------------------------------------------------------------|-----------------------------------------------------------------------------------------------------------------------------------------------------------------------------------------------------------------------------------------------------------------------------------------------------------------------------------------------|---------|-----------------|
| <i>Lactobacillus plantarum</i> ECGC 13110402                                                                                                | Ingredient in foods generally, excluding infant formulae and foods that would require additional regulatory review by USDA, at levels up to $1 \times 10^{10}$ CFU/serving                                                                                                                                                                    | 847     | Sept 30, 2019   |
| <i>Lactobacillus paracasei</i> strain F19                                                                                                   | Probiotic microorganism in conventional foods, excluding USDA-regulated foods, at levels intended to provide at a minimum of $10^9$ CFU/serving                                                                                                                                                                                               | 840     | Aug 27, 2019    |
| <i>Lactobacillus paracasei</i> subsp. <i>paracasei</i> strain F-19e                                                                         | Ingredient in powdered-milk-based nonexempt infant formulae at levels intended to provide a daily intake of $10^9$ CFU of the strain                                                                                                                                                                                                          | 810     | Apr 5, 2019     |
| <i>Lactobacillus curvatus</i> DSM 18775                                                                                                     | To suppress the growth of <i>Listeria monocytogenes</i> in ready-to-eat cooked meat and poultry products                                                                                                                                                                                                                                      | 760     | Jan 29, 2019    |
| <i>Lactobacillus helveticus</i> R0052, <i>Bifidobacterium longum</i> subsp. <i>infantis</i> R0033, and <i>Bifidobacterium bifidum</i> R0071 | Both individually and in combination, as an ingredient of powdered infant formulae at $5 \times 10^7$ CFU/g of powder in formulae with hydration rates of 12.5 to 13/5 g/100 mL                                                                                                                                                               | 758     | Aug 20, 2018    |
| <i>Lactobacillus casei</i> subsp. <i>paracasei</i> Lpc-37                                                                                   | Ingredient in yogurt and other dairy products, soy products, beverages, chewing gum, and confectionary snacks                                                                                                                                                                                                                                 | 736     | Apr 11, 2018    |
| <i>Lactobacillus plantarum</i> Lp-115                                                                                                       | Ingredient in yogurt and other dairy products; soy products; beverages; chewing gum, confectionary snacks and other foods at levels not more than $5 \times 10^{11}$ CFU/serving                                                                                                                                                              | 722     | Feb 16, 2018    |
| <i>Lactobacillus plantarum</i> strain 299v                                                                                                  | Probiotic microorganism in conventional foods at a use level of up to $10^{11}$ CFU/serving                                                                                                                                                                                                                                                   | 685     | Oct 31, 2017    |
| <i>Lactobacillus fermentum</i> CECT5716                                                                                                     | In powdered-milk-based infant formulae at $10^7$ CFU/g of powdered formula                                                                                                                                                                                                                                                                    | 531     | Mar 20, 2015    |
| <i>Lactobacillus acidophilus</i> La-14                                                                                                      | Ingredient in certain food categories at a level of $10^9$ CFU/250 g serving of food at the time of consumption                                                                                                                                                                                                                               | 502     | Aug 19, 2014    |
| <i>Lactobacillus reuteri</i> strain NCIMB 30242                                                                                             | Ingredient in beverages and beverage bases, breakfast cereals, cheeses, dairy product analogs, fats and oils, frozen dairy desserts, grain products and pasta, milk products, processed fruit and fruit juices, and sugar substitutes at levels ranging from $3.3 \times 10^8$ to $10^{10}$ CFU/serving                                       | 440     | Feb 12, 2013    |
| <i>Lactobacillus casei</i> strain Shirota                                                                                                   | Ingredient in fermented dairy products at a maximum level of $4 \times 10^8$ CFU/mL                                                                                                                                                                                                                                                           | 429     | Dec 10, 2012    |
| <i>Lactobacillus reuteri</i> strain DSM 17938                                                                                               | Ingredient in powdered-whey-based term infant formulae at a minimum level of $10^6$ CFU/g, but not higher than $10^8$ CFU/g of powdered formula, produced in accordance with current good manufacturing practices                                                                                                                             | 410     | Mar 26, 2012    |
| <i>Lactobacillus acidophilus</i> NCFM                                                                                                       | Ingredient in certain dairy products, functional beverages, nutritional powders, juices, bars, ready-to-eat breakfast cereals, chewing gum, and confectionery, at levels not to exceed current good manufacturing practice in accordance with 21 CFR 184.1(b)                                                                                 | 357     | Apr 19, 2011    |
| <i>Lactobacillus rhamnosus</i> strain HN001                                                                                                 | Ingredient in various foods, including certain beverages and beverage bases (excluding soft drinks); cheeses; milk drinks; milk products; meal replacements; energy bars; ready-to-eat cereals; fruit juices, nectars, ades, and drinks; confectionery; chewing gum, and hard candies at a level to provide up to $10^9$ CFU/standard serving | 288     | Nov 1, 2009     |
| <i>Lactobacillus rhamnosus</i> strain HN001 produced in a milk-based medium                                                                 | Ingredient in milk-based powdered term infant formulae that is intended for consumption from the time of birth, as well as                                                                                                                                                                                                                    | 281     | Aug 31, 2009    |

|                                                                                                                                                                                                                                                                                                                                                                    |                                                                                                                                                                                                                                                                                                                                                                                                                                                                                                                                                                                                           |     |              |
|--------------------------------------------------------------------------------------------------------------------------------------------------------------------------------------------------------------------------------------------------------------------------------------------------------------------------------------------------------------------|-----------------------------------------------------------------------------------------------------------------------------------------------------------------------------------------------------------------------------------------------------------------------------------------------------------------------------------------------------------------------------------------------------------------------------------------------------------------------------------------------------------------------------------------------------------------------------------------------------------|-----|--------------|
|                                                                                                                                                                                                                                                                                                                                                                    | in milk-based powdered follow-on formulae, at a level of 10 <sup>8</sup> CFU/g of the formula powder                                                                                                                                                                                                                                                                                                                                                                                                                                                                                                      |     |              |
| <i>Lactobacillus reuteri</i> strain DSM 17938                                                                                                                                                                                                                                                                                                                      | Ingredient in processed cheeses, yogurt, ice cream, fruit juices, fruit drinks, processed vegetables, processed vegetable drinks, beverage bases, energy bars, energy drinks, and chewing gum at a level up to 10 <sup>9</sup> CFU/serving, and in a drinking straw at a level of 10 <sup>9</sup> CFU/straw                                                                                                                                                                                                                                                                                               | 254 | Nov 18, 2008 |
| <i>Lactobacillus casei</i> subsp. <i>rhamnosus</i> strain GG                                                                                                                                                                                                                                                                                                       | Ingredient in term infant formulae, at levels not to exceed 10 <sup>8</sup> CFU/g of powdered formula                                                                                                                                                                                                                                                                                                                                                                                                                                                                                                     | 231 | May 29, 2008 |
| <i>Lactobacillus acidophilus</i> , <i>Lactobacillus lactis</i> , and <i>Pediococcus acidilactici</i>                                                                                                                                                                                                                                                               | Antimicrobial to control pathogenic bacteria in meat and poultry products                                                                                                                                                                                                                                                                                                                                                                                                                                                                                                                                 | 171 | Dec 7, 2005  |
| <i>Streptococcus salivarius</i> M18                                                                                                                                                                                                                                                                                                                                | Ingredient in baby, infant, and toddler foods (excluding infant formulae); baked goods and baking mixes; beverage and beverage bases; breakfast cereals; cheeses; chewing gum; dairy product analogs; frozen dairy desserts and mixes; gelatins, puddings, and fillings; grain products and pastas; hard candy; milk, whole and skimmed; milk products; nuts and nut products; processed fruit and fruit juices; soft candy; sweet sauces, toppings, and syrups at a level of 20 mg/serving, providing a minimum of 1 x10 <sup>9</sup> CFU/serving                                                        | 807 | Jun 6, 2019  |
| <i>Streptococcus salivarius</i> K12                                                                                                                                                                                                                                                                                                                                | Ingredient in baby, infant, and toddler food (excluding infant formulae), baked goods and baking mixes, beverage and beverage bases, breakfast cereals, cheeses, chewing gum, dairy product analogs, frozen dairy desserts and mixes, gelatins, puddings and fillings, grain products and pasta, hard candy, milk, whole and skimmed; milk products, nuts and nut products, processed fruit and fruit juices, soft candy, sweet sauces, toppings and syrups, and medical foods, at levels up to 20 mg/serving (providing a minimum of 2 x10 <sup>9</sup> CFU/serving)                                     | 591 | Jan 25, 2016 |
| <i>Carnobacterium maltaromaticum</i> strain CB1 (viable and heat-treated)                                                                                                                                                                                                                                                                                          | Inhibitor of <i>Listeria monocytogenes</i> in a variety of foods including meat and poultry, as follows: (1) viable <i>C. maltaromaticum</i> CB1 in ready-to-eat meat products; meat, poultry, and fish products; frozen meals; processed fruit salads and vegetable salads; sauces; and, soft cheese and cheese spread-type products; and (2) heat-treated <i>C. maltaromaticum</i> CB1 as an inhibitor of <i>L. monocytogenes</i> in ready-to-eat meat products, meat, poultry, fish, and mixtures; fruit and vegetables; soups and stews; sauces and dressings; cheese and cheese spread-type products | 305 | Apr 19, 2010 |
| <i>Carnobacterium maltaromaticum</i> strain CB1                                                                                                                                                                                                                                                                                                                    | Inhibitor of the growth of <i>Listeria monocytogenes</i> in ready-to-eat meat products                                                                                                                                                                                                                                                                                                                                                                                                                                                                                                                    | 159 | May 27, 2005 |
| <i>Bifidobacterium lactis</i> strain Bb12 and <i>Streptococcus thermophilus</i> strain Th4                                                                                                                                                                                                                                                                         | Ingredients in milk-based infant formulae that is intended for consumption by infants four months and older, at levels not to exceed good manufacturing practice                                                                                                                                                                                                                                                                                                                                                                                                                                          | 49  | Mar 19, 2002 |
| Cultured [dairy sources, sugars, wheat, malt, and fruit- and vegetable-based sources] fermented by [ <i>Streptococcus thermophilus</i> , <i>Bacillus coagulans</i> , <i>Lactobacillus acidophilus</i> , <i>Lactobacillus paracasei</i> subsp. <i>paracasei</i> , <i>Lactobacillus plantarum</i> , <i>Lactobacillus sakei</i> , <i>Lactobacillus bulgaricus</i> and | Antimicrobial agents in a variety of food categories typically at levels of 0.1% to 4.5%, including meat and poultry, but excepting infant formulae and infant foods                                                                                                                                                                                                                                                                                                                                                                                                                                      | 378 | Mar 26, 2012 |

|                                                                                                                                                                                                                                                                    |                                                                                                                                                                                              |     |              |
|--------------------------------------------------------------------------------------------------------------------------------------------------------------------------------------------------------------------------------------------------------------------|----------------------------------------------------------------------------------------------------------------------------------------------------------------------------------------------|-----|--------------|
| <i>Propionibacterium freudenreichii</i><br>subsp. <i>shermanii</i> or mixtures of<br>these strains]                                                                                                                                                                | Antimicrobial agent in meat and poultry products at a level<br>of 4.8%                                                                                                                       | 240 | Oct 24, 2008 |
| Corn, cane, or beet sugar cultured<br>with <i>Lactobacillus paracasei</i><br>subsp. <i>paracasei</i> , <i>Bacillus</i><br><i>coagulans</i> LA-1, or<br><i>Propionibacterium freudenreichii</i><br>subsp. <i>shermanii</i> , or mixtures of<br>these microorganisms | Support of the growth of <i>Streptococcus</i> , <i>Lactobacillus</i> , and<br><i>Leuconostoc</i> species in fermented dairy and soy products at<br>levels not to exceed 20 parts per million | 668 | Mar 9, 2017  |
